# Supplementary material for: Homeostasis of phospholipids — The level of phosphatidylethanolamine tightly adapts to changes in ethanolamine plasmalogens
Source: PubMed Central journal article supplement (PMC4331674; doi:10.1016/j.bbalip.2014.11.005), 2015-02
Supplement: mmc1.pdf [file mmc1.pdf]

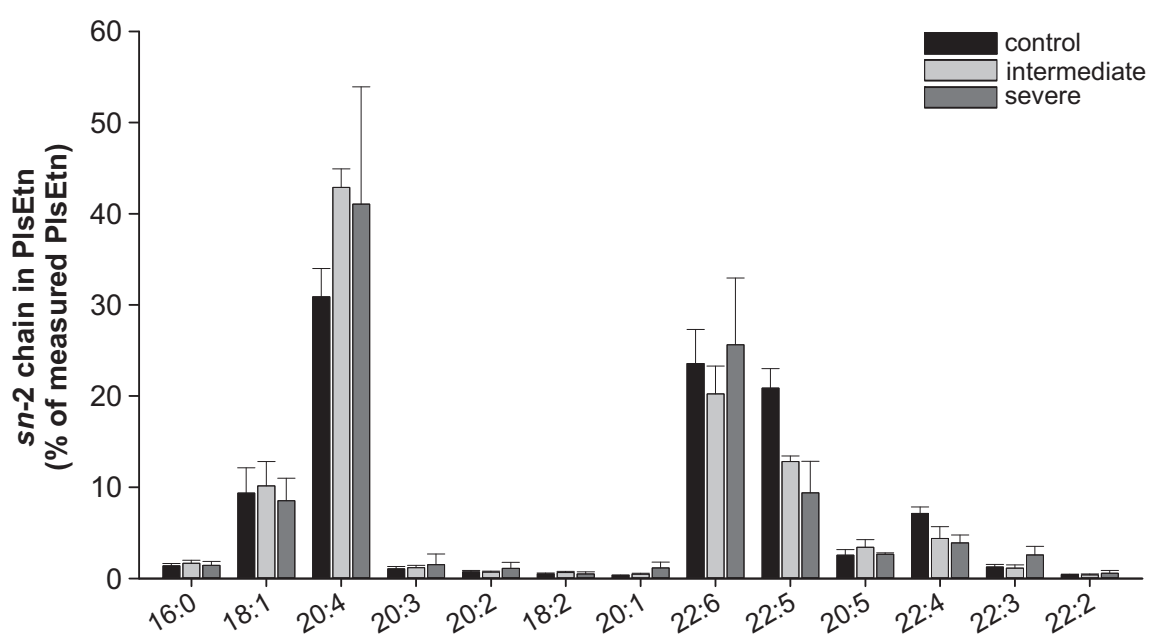

**Supplementary Figure 1. The sn-2 position of PlsEtn in cultured human primary skin fibroblasts is mostly occupied by PUFAs.** Sn-2 side chains of PlsEtn in primary human fibroblasts are depicted as % of total measured PlsEtn. Mind the normalization to total PlsEtn due to the low levels in RCDP cells. For values normalized to controls, refer to Fig. 4A. Data represent means  $\pm$  SD of at least three different cell lines.

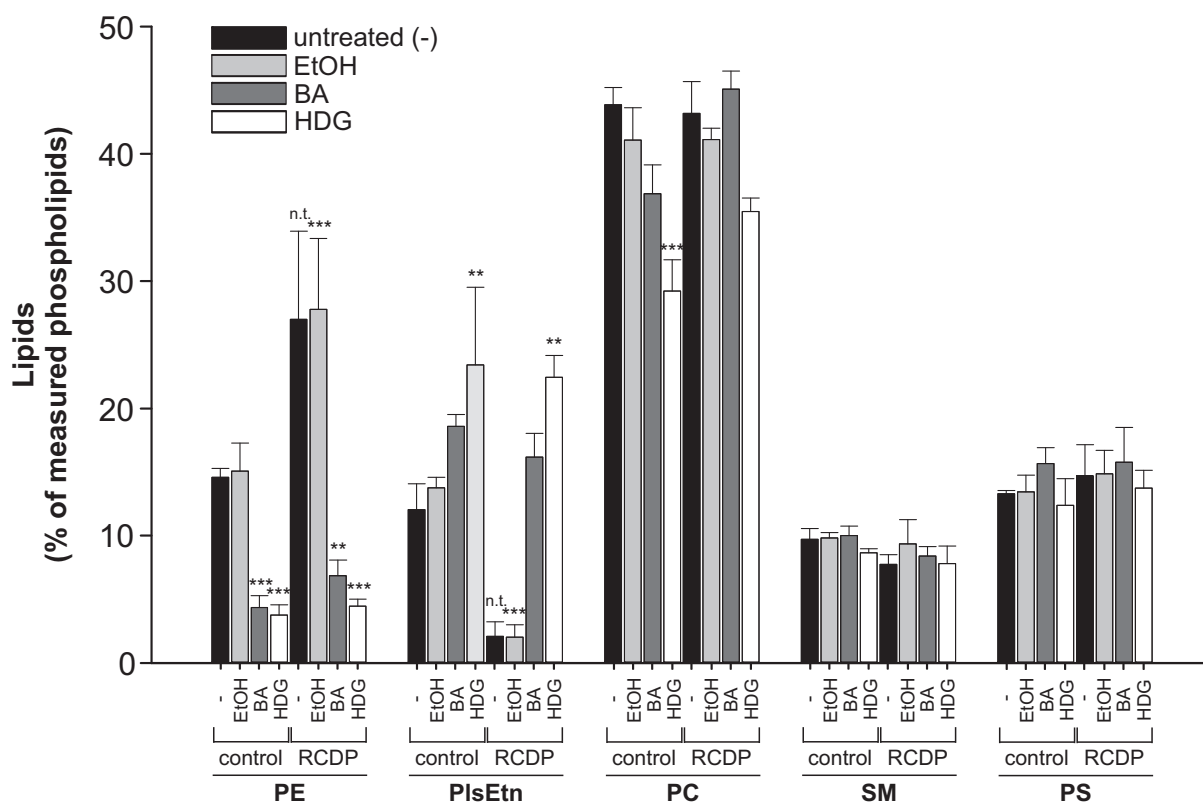

**Supplementary Figure 2. The levels of non-ethanolamine phospholipids are hardly affected by plasmalogen precursor supplementation.** The levels of the main phospholipid classes were determined in untreated, solvent-treated or plasmalogen precursor-treated primary human fibroblasts derived from a control and a severely affected RCDP patient. Data shown are means  $\pm$  SD of three independent experiments.  $***P \leq 0.001$ ;  $**P \leq 0.01$  (one-way ANOVA with Dunnett's post hoc test; Bonferroni-Holm correction for multiple testing in control lipid classes). BA, batyl alcohol; HDG, hexadecylglycerol; n.t., not tested; PE, phosphatidylethanolamine; PlsEtn, ethanolamine plasmalogen; PC, phosphatidylcholine; SM, sphingomyelin; PS, phosphatidylserine

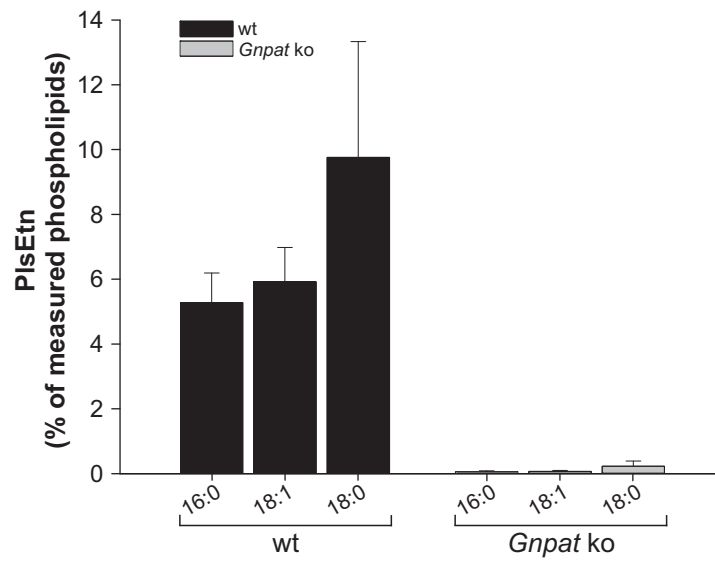

**Supplementary Figure 3. C18:0 is the major sn-1 species in PlsEtn in the murine wild type brain gray matter.** PlsEtn levels were determined in wild type (wt) and *Gnpat* knockout (ko) mouse gray matter brain tissue. Data are means  $\pm$  SD of 10 (wt) and 4 (*Gnpat* ko) animals per group. 16:0, 18:0 and 18:1 indicate the different sn-1 moieties.

**Supplementary Table 1:** Summary of detected phospholipid species

| PlsEtn species   | PC species | PE species | PS species | SM species |
|------------------|------------|------------|------------|------------|
| PlsEtn 16:0-16:0 | PC 30:2    | PE 32:2    | PS 32:2    | SM 16:1    |
| PlsEtn 16:0-18:1 | PC 30:1    | PE 32:1    | PS 32:1    | SM 16:0    |
| PlsEtn 18:1-16:0 | PC 30:0    | PE 34:2    | PS 34:2    | SM 18:1    |
| PlsEtn 16:0-20:4 | PC 32:3    | PE 34:1    | PS 34:1    | SM 18:0    |
| PlsEtn 16:0-20:3 | PC 32:2    | PE 36:5    | PS 36:3    | SM 20:1    |
| PlsEtn 16:0-20:2 | PC 32:1    | PE 36:4    | PS 36:2    | SM 20:0    |
| PlsEtn 18:1-18:1 | PC 32:0    | PE 36:3    | PS 36:1    | SM 22:1    |
| PlsEtn 18:0-18:2 | PC 34:4    | PE 36:2    | PS 36:0    | SM 22:0    |
| PlsEtn 18:0-18:1 | PC 34:3    | PE 36:1    | PS 38:4    | SM 24:2    |
| PlsEtn 16:0-20:1 | PC 34:2    | PE 38:6    | PS 38:3    | SM 24:1    |
| PlsEtn 16:0-22:6 | PC 34:1    | PE 38:5    | PS 38:2    | SM 24:0    |
| PlsEtn 18:1-20:4 | PC 34:0    | PE 38:4    | PS 38:1    |            |
| PlsEtn 16:0-22:5 | PC 36:6    | PE 38:3    | PS 40:7    |            |
| PlsEtn 18:0-20:5 | PC 36:5    | PE 38:2    | PS 40:6    |            |
| PlsEtn 16:0-22:4 | PC 36:4    | PE 38:1    | PS 40:5    |            |
| PlsEtn 18:0-20:4 | PC 36:3    | PE 40:7    | PS 40:4    |            |
| PlsEtn 18:1-20:3 | PC 36:2    | PE 40:6    | PS 40:3    |            |
| PlsEtn 16:0-22:3 | PC 36:1    | PE 40:5    |            |            |
| PlsEtn 18:1-20:2 | PC 36:0    | PE 40:4    |            |            |
| PlsEtn 18:0-20:3 | PC 38:6    | PE 40:3    |            |            |
| PlsEtn 16:0-22:2 | PC 38:5    |            |            |            |
| PlsEtn 18:1-20:1 | PC 38:4    |            |            |            |
| PlsEtn 18:0-20:2 | PC 38:3    |            |            |            |
| PlsEtn 18:0-20:1 | PC 38:2    |            |            |            |
| PlsEtn 18:1-22:6 | PC 38:1    |            |            |            |
| PlsEtn 18:0-22:6 | PC 38:0    |            |            |            |
| PlsEtn 18:1-22:5 | PC 40:6    |            |            |            |
| PlsEtn 18:0-22:5 | PC 40:5    |            |            |            |
| PlsEtn 18:1-22:4 | PC 40:4    |            |            |            |
| PlsEtn 18:0-22:4 |            |            |            |            |
| PlsEtn 18:1-22:3 |            |            |            |            |
| PlsEtn 18:1-22:2 |            |            |            |            |
| PlsEtn 18:0-22:3 |            |            |            |            |
